# Supplementary material for: Harnessing Skyrmion Hall Effect by Thickness Gradients in Wedge-Shaped Samples of Cubic Helimagnets
Source: Nanomaterials (Basel). 2023 Jul 14;13(14):2073. doi: 10.3390/nano13142073 (PMC10383481; doi:10.3390/nano13142073)
Supplement: Supplementary file 1 [file nanomaterials-13-02073-s001.zip]

Archive with 6 entries (6 files):
- Supplementary Video S1.mp4
- Supplementary Videos.pdf
- Supplementary_Video_S2.mp4
- Supplementary_Video_S3.mp4
- Supplementary_Video_S4.mp4
- Supplementary_Video_S5.mp4
